# Supplementary material for: Fine Mapping and Distribution Analysis of Hybrid Necrosis Genes Ne1 and Ne2 in Wheat in China
Source: Research Square preprint supplement (doi:10.21203/rs.3.rs-896913/v1), 2021-09-21
Supplement: Supplementary file 1 [file 091668681b4eccdbf801607f.xlsx]

## Sheet: Allelism tests
Cultivars containing Ne genes in this study	Cultivars containing Ne genes in previous reports	Genetic population	Female parent	Male parenta	Necrotic plantsb	Normal plantsc	Ratio (%)d	Investigation Condition
N9134 (Ne1)	Spica (Ne1s)	multiple cross F1	Zhoumai 22	Spica / N9134	178	1	0.558659	Heading; Field
N9134 (Ne1)	TA4152-60 (Ne1)	multiple cross F1	Zhoumai 22	TA4152-60 / N9134	148	1	0.671141	Heading; Field
Notes: a. The F1-plants of the cross as male parent. b.The number of necrotic plants in the multiple cross F1 population. c.The number of normal plants in the multiple cross F1 population. d.The ratio of normal plants in the multiple cross F1 population.
