# Supplementary material for: Fine Mapping and Distribution Analysis of Hybrid Necrosis Genes Ne1 and Ne2 in Wheat in China
Source: Research Square preprint supplement (doi:10.21203/rs.3.rs-896913/v1), 2021-09-21
Supplement: Supplementary file 2 [file d696488e0c182e05d3f4cd7d.xlsx]

## Sheet: Dosage effect of F2_3
Years	Genetic population	Cross and phenotype of the parents	Necrotic plants	Normal plants	Seeds planted	Living plants rate (%)	Investigation Condition
2018-19	F2:3	(N9134 / Zhoumai 22) or (Zhoumai 22 / N9134), necrosis	0	0	4	0	Heading, Field
2018-19	F2:3	(N9134 / Zhoumai 22) or (Zhoumai 22 / N9134), necrosis	2	0	4	50	Heading, Field
2018-19	F2:3	(N9134 / Zhoumai 22) or (Zhoumai 22 / N9134), necrosis	1	0	5	20	Heading, Field
2018-19	F2:3	(N9134 / Zhoumai 22) or (Zhoumai 22 / N9134), necrosis	1	0	5	20	Heading, Field
2018-19	F2:3	(N9134 / Zhoumai 22) or (Zhoumai 22 / N9134), necrosis	2	1	5	60	Heading, Field
2018-19	F2:3	(N9134 / Zhoumai 22) or (Zhoumai 22 / N9134), necrosis	1	1	6	33.3333	Heading, Field
2018-19	F2:3	(N9134 / Zhoumai 22) or (Zhoumai 22 / N9134), necrosis	1	1	7	28.5714	Heading, Field
2018-19	F2:3	(N9134 / Zhoumai 22) or (Zhoumai 22 / N9134), necrosis	5	1	8	75	Heading, Field
2018-19	F2:3	(N9134 / Zhoumai 22) or (Zhoumai 22 / N9134), necrosis	5	2	8	87.5	Heading, Field
2018-19	F2:3	(N9134 / Zhoumai 22) or (Zhoumai 22 / N9134), necrosis	3	1	8	50	Heading, Field
2018-19	F2:3	(N9134 / Zhoumai 22) or (Zhoumai 22 / N9134), necrosis	3	2	8	62.5	Heading, Field
2018-19	F2:3	(N9134 / Zhoumai 22) or (Zhoumai 22 / N9134), necrosis	3	5	9	88.8889	Heading, Field
2018-19	F2:3	(N9134 / Zhoumai 22) or (Zhoumai 22 / N9134), necrosis	5	2	10	70	Heading, Field
2018-19	F2:3	(N9134 / Zhoumai 22) or (Zhoumai 22 / N9134), necrosis	3	1	10	40	Heading, Field
2018-19	F2:3	(N9134 / Zhoumai 22) or (Zhoumai 22 / N9134), necrosis	5	3	12	66.6667	Heading, Field
2018-19	F2:3	(N9134 / Zhoumai 22) or (Zhoumai 22 / N9134), necrosis	3	5	13	61.5385	Heading, Field
2018-19	F2:3	(N9134 / Zhoumai 22) or (Zhoumai 22 / N9134), necrosis	4	3	13	53.8462	Heading, Field
2018-19	F2:3	(N9134 / Zhoumai 22) or (Zhoumai 22 / N9134), necrosis	5	6	13	84.6154	Heading, Field
2018-19	F2:3	(N9134 / Zhoumai 22) or (Zhoumai 22 / N9134), necrosis	5	3	13	61.5385	Heading, Field
2018-19	F2:3	(N9134 / Zhoumai 22) or (Zhoumai 22 / N9134), necrosis	8	3	13	84.6154	Heading, Field
2018-19	F2:3	(N9134 / Zhoumai 22) or (Zhoumai 22 / N9134), necrosis	5	2	13	53.8462	Heading, Field
2018-19	F2:3	(N9134 / Zhoumai 22) or (Zhoumai 22 / N9134), necrosis	5	4	13	69.2308	Heading, Field
2018-19	F2:3	(N9134 / Zhoumai 22) or (Zhoumai 22 / N9134), necrosis	3	1	13	30.7692	Heading, Field
2018-19	F2:3	(N9134 / Zhoumai 22) or (Zhoumai 22 / N9134), necrosis	4	3	13	53.8462	Heading, Field
2018-19	F2:3	(N9134 / Zhoumai 22) or (Zhoumai 22 / N9134), necrosis	2	2	14	28.5714	Heading, Field
2018-19	F2:3	(N9134 / Zhoumai 22) or (Zhoumai 22 / N9134), necrosis	8	3	14	78.5714	Heading, Field
2018-19	F2:3	(N9134 / Zhoumai 22) or (Zhoumai 22 / N9134), necrosis	5	1	14	42.8571	Heading, Field
2018-19	F2:3	(N9134 / Zhoumai 22) or (Zhoumai 22 / N9134), necrosis	4	7	14	78.5714	Heading, Field
2018-19	F2:3	(N9134 / Zhoumai 22) or (Zhoumai 22 / N9134), necrosis	5	3	14	57.1429	Heading, Field
2018-19	F2:3	(N9134 / Zhoumai 22) or (Zhoumai 22 / N9134), necrosis	4	4	14	57.1429	Heading, Field
2018-19	F2:3	(N9134 / Zhoumai 22) or (Zhoumai 22 / N9134), necrosis	7	3	15	66.6667	Heading, Field
2018-19	F2:3	(N9134 / Zhoumai 22) or (Zhoumai 22 / N9134), necrosis	7	2	15	60	Heading, Field
2018-19	F2:3	(N9134 / Zhoumai 22) or (Zhoumai 22 / N9134), necrosis	3	5	15	53.3333	Heading, Field
2018-19	F2:3	(N9134 / Zhoumai 22) or (Zhoumai 22 / N9134), necrosis	7	4	15	73.3333	Heading, Field
2018-19	F2:3	(N9134 / Zhoumai 22) or (Zhoumai 22 / N9134), necrosis	6	4	16	62.5	Heading, Field
2018-19	F2:3	(N9134 / Zhoumai 22) or (Zhoumai 22 / N9134), necrosis	5	2	16	43.75	Heading, Field
2018-19	F2:3	(N9134 / Zhoumai 22) or (Zhoumai 22 / N9134), necrosis	7	4	16	68.75	Heading, Field
2018-19	F2:3	(N9134 / Zhoumai 22) or (Zhoumai 22 / N9134), necrosis	5	4	16	56.25	Heading, Field
2018-19	F2:3	(N9134 / Zhoumai 22) or (Zhoumai 22 / N9134), necrosis	3	5	16	50	Heading, Field
2018-19	F2:3	(N9134 / Zhoumai 22) or (Zhoumai 22 / N9134), necrosis	5	5	17	58.8235	Heading, Field
2018-19	F2:3	(N9134 / Zhoumai 22) or (Zhoumai 22 / N9134), necrosis	7	7	17	82.3529	Heading, Field
2018-19	F2:3	(N9134 / Zhoumai 22) or (Zhoumai 22 / N9134), necrosis	13	4	17	100	Heading, Field
2018-19	F2:3	(N9134 / Zhoumai 22) or (Zhoumai 22 / N9134), necrosis	5	2	18	38.8889	Heading, Field
2018-19	F2:3	(N9134 / Zhoumai 22) or (Zhoumai 22 / N9134), necrosis	6	5	18	61.1111	Heading, Field
2018-19	F2:3	(N9134 / Zhoumai 22) or (Zhoumai 22 / N9134), necrosis	6	7	18	72.2222	Heading, Field
2018-19	F2:3	(N9134 / Zhoumai 22) or (Zhoumai 22 / N9134), necrosis	5	5	18	55.5556	Heading, Field
2018-19	F2:3	(N9134 / Zhoumai 22) or (Zhoumai 22 / N9134), necrosis	7	9	19	84.2105	Heading, Field
2018-19	F2:3	(N9134 / Zhoumai 22) or (Zhoumai 22 / N9134), necrosis	7	4	19	57.8947	Heading, Field
2018-19	F2:3	(N9134 / Zhoumai 22) or (Zhoumai 22 / N9134), necrosis	6	8	19	73.6842	Heading, Field
2018-19	F2:3	(N9134 / Zhoumai 22) or (Zhoumai 22 / N9134), necrosis	12	5	19	89.4737	Heading, Field
2018-19	F2:3	(N9134 / Zhoumai 22) or (Zhoumai 22 / N9134), necrosis	13	5	19	94.7368	Heading, Field
2018-19	F2:3	(N9134 / Zhoumai 22) or (Zhoumai 22 / N9134), necrosis	9	7	19	84.2105	Heading, Field
2018-19	F2:3	(N9134 / Zhoumai 22) or (Zhoumai 22 / N9134), necrosis	10	4	20	70	Heading, Field
2018-19	F2:3	(N9134 / Zhoumai 22) or (Zhoumai 22 / N9134), necrosis	7	7	20	70	Heading, Field
2018-19	F2:3	(N9134 / Zhoumai 22) or (Zhoumai 22 / N9134), necrosis	5	4	20	45	Heading, Field
2018-19	F2:3	(N9134 / Zhoumai 22) or (Zhoumai 22 / N9134), necrosis	3	4	21	33.3333	Heading, Field
2018-19	F2:3	(N9134 / Zhoumai 22) or (Zhoumai 22 / N9134), necrosis	5	5	21	47.619	Heading, Field
2018-19	F2:3	(N9134 / Zhoumai 22) or (Zhoumai 22 / N9134), necrosis	6	7	21	61.9048	Heading, Field
2018-19	F2:3	(N9134 / Zhoumai 22) or (Zhoumai 22 / N9134), necrosis	9	6	21	71.4286	Heading, Field
2018-19	F2:3	(N9134 / Zhoumai 22) or (Zhoumai 22 / N9134), necrosis	11	6	21	80.9524	Heading, Field
2018-19	F2:3	(N9134 / Zhoumai 22) or (Zhoumai 22 / N9134), necrosis	9	4	22	59.0909	Heading, Field
2018-19	F2:3	(N9134 / Zhoumai 22) or (Zhoumai 22 / N9134), necrosis	7	9	22	72.7273	Heading, Field
2018-19	F2:3	(N9134 / Zhoumai 22) or (Zhoumai 22 / N9134), necrosis	10	3	22	59.0909	Heading, Field
2018-19	F2:3	(N9134 / Zhoumai 22) or (Zhoumai 22 / N9134), necrosis	6	8	22	63.6364	Heading, Field
2018-19	F2:3	(N9134 / Zhoumai 22) or (Zhoumai 22 / N9134), necrosis	10	9	22	86.3636	Heading, Field
2018-19	F2:3	(N9134 / Zhoumai 22) or (Zhoumai 22 / N9134), necrosis	7	8	22	68.1818	Heading, Field
2018-19	F2:3	(N9134 / Zhoumai 22) or (Zhoumai 22 / N9134), necrosis	11	8	22	86.3636	Heading, Field
2018-19	F2:3	(N9134 / Zhoumai 22) or (Zhoumai 22 / N9134), necrosis	8	10	22	81.8182	Heading, Field
2018-19	F2:3	(N9134 / Zhoumai 22) or (Zhoumai 22 / N9134), necrosis	8	7	22	68.1818	Heading, Field
2018-19	F2:3	(N9134 / Zhoumai 22) or (Zhoumai 22 / N9134), necrosis	9	4	22	59.0909	Heading, Field
2018-19	F2:3	(N9134 / Zhoumai 22) or (Zhoumai 22 / N9134), necrosis	4	7	22	50	Heading, Field
2018-19	F2:3	(N9134 / Zhoumai 22) or (Zhoumai 22 / N9134), necrosis	6	6	22	54.5455	Heading, Field
2018-19	F2:3	(N9134 / Zhoumai 22) or (Zhoumai 22 / N9134), necrosis	12	5	22	77.2727	Heading, Field
2018-19	F2:3	(N9134 / Zhoumai 22) or (Zhoumai 22 / N9134), necrosis	12	3	22	68.1818	Heading, Field
2018-19	F2:3	(N9134 / Zhoumai 22) or (Zhoumai 22 / N9134), necrosis	8	9	22	77.2727	Heading, Field
2018-19	F2:3	(N9134 / Zhoumai 22) or (Zhoumai 22 / N9134), necrosis	7	8	22	68.1818	Heading, Field
2018-19	F2:3	(N9134 / Zhoumai 22) or (Zhoumai 22 / N9134), necrosis	9	3	22	54.5455	Heading, Field
2018-19	F2:3	(N9134 / Zhoumai 22) or (Zhoumai 22 / N9134), necrosis	12	5	22	77.2727	Heading, Field
2018-19	F2:3	(N9134 / Zhoumai 22) or (Zhoumai 22 / N9134), necrosis	12	7	22	86.3636	Heading, Field
2018-19	F2:3	(N9134 / Zhoumai 22) or (Zhoumai 22 / N9134), necrosis	7	4	22	50	Heading, Field
2018-19	F2:3	(N9134 / Zhoumai 22) or (Zhoumai 22 / N9134), necrosis	6	10	22	72.7273	Heading, Field
2018-19	F2:3	(N9134 / Zhoumai 22) or (Zhoumai 22 / N9134), necrosis	10	6	22	72.7273	Heading, Field
2018-19	F2:3	(N9134 / Zhoumai 22) or (Zhoumai 22 / N9134), necrosis	9	8	22	77.2727	Heading, Field
2018-19	F2:3	(N9134 / Zhoumai 22) or (Zhoumai 22 / N9134), necrosis	5	9	22	63.6364	Heading, Field
2018-19	F2:3	(N9134 / Zhoumai 22) or (Zhoumai 22 / N9134), necrosis	4	8	22	54.5455	Heading, Field
2018-19	F2:3	(N9134 / Zhoumai 22) or (Zhoumai 22 / N9134), necrosis	6	6	22	54.5455	Heading, Field
2018-19	F2:3	(N9134 / Zhoumai 22) or (Zhoumai 22 / N9134), necrosis	8	7	22	68.1818	Heading, Field
2018-19	F2:3	(N9134 / Zhoumai 22) or (Zhoumai 22 / N9134), necrosis	6	10	22	72.7273	Heading, Field
2018-19	F2:3	(N9134 / Zhoumai 22) or (Zhoumai 22 / N9134), necrosis	11	4	22	68.1818	Heading, Field
2018-19	F2:3	(N9134 / Zhoumai 22) or (Zhoumai 22 / N9134), necrosis	8	9	22	77.2727	Heading, Field
2018-19	F2:3	(N9134 / Zhoumai 22) or (Zhoumai 22 / N9134), necrosis	11	4	22	68.1818	Heading, Field
2018-19	F2:3	(N9134 / Zhoumai 22) or (Zhoumai 22 / N9134), necrosis	8	7	22	68.1818	Heading, Field
2018-19	F2:3	(N9134 / Zhoumai 22) or (Zhoumai 22 / N9134), necrosis	10	7	22	77.2727	Heading, Field
2018-19	F2:3	(N9134 / Zhoumai 22) or (Zhoumai 22 / N9134), necrosis	7	8	22	68.1818	Heading, Field
2018-19	F2:3	(N9134 / Zhoumai 22) or (Zhoumai 22 / N9134), necrosis	7	7	22	63.6364	Heading, Field
2018-19	F2:3	(N9134 / Zhoumai 22) or (Zhoumai 22 / N9134), necrosis	10	6	22	72.7273	Heading, Field
2018-19	F2:3	(N9134 / Zhoumai 22) or (Zhoumai 22 / N9134), necrosis	5	7	22	54.5455	Heading, Field
2018-19	F2:3	(N9134 / Zhoumai 22) or (Zhoumai 22 / N9134), necrosis	10	6	22	72.7273	Heading, Field
2018-19	F2:3	(N9134 / Zhoumai 22) or (Zhoumai 22 / N9134), necrosis	8	5	22	59.0909	Heading, Field
2018-19	F2:3	(N9134 / Zhoumai 22) or (Zhoumai 22 / N9134), necrosis	12	4	22	72.7273	Heading, Field
2018-19	F2:3	(N9134 / Zhoumai 22) or (Zhoumai 22 / N9134), necrosis	7	7	22	63.6364	Heading, Field
2018-19	F2:3	(N9134 / Zhoumai 22) or (Zhoumai 22 / N9134), necrosis	4	7	22	50	Heading, Field
2018-19	F2:3	(N9134 / Zhoumai 22) or (Zhoumai 22 / N9134), necrosis	6	6	22	54.5455	Heading, Field
2018-19	F2:3	(N9134 / Zhoumai 22) or (Zhoumai 22 / N9134), necrosis	10	8	22	81.8182	Heading, Field
2018-19	F2:3	(N9134 / Zhoumai 22) or (Zhoumai 22 / N9134), necrosis	10	6	22	72.7273	Heading, Field
2018-19	F2:3	(N9134 / Zhoumai 22) or (Zhoumai 22 / N9134), necrosis	14	4	22	81.8182	Heading, Field
2018-19	F2:3	(N9134 / Zhoumai 22) or (Zhoumai 22 / N9134), necrosis	9	5	22	63.6364	Heading, Field
2018-19	F2:3	(N9134 / Zhoumai 22) or (Zhoumai 22 / N9134), necrosis	6	9	22	68.1818	Heading, Field
2018-19	F2:3	(N9134 / Zhoumai 22) or (Zhoumai 22 / N9134), necrosis	8	10	22	81.8182	Heading, Field
2018-19	F2:3	(N9134 / Zhoumai 22) or (Zhoumai 22 / N9134), necrosis	7	5	22	54.5455	Heading, Field
2018-19	F2:3	(N9134 / Zhoumai 22) or (Zhoumai 22 / N9134), necrosis	5	5	22	45.4545	Heading, Field
2018-19	F2:3	(N9134 / Zhoumai 22) or (Zhoumai 22 / N9134), necrosis	11	5	22	72.7273	Heading, Field
2018-19	F2:3	(N9134 / Zhoumai 22) or (Zhoumai 22 / N9134), necrosis	8	5	22	59.0909	Heading, Field
2018-19	F2:3	(N9134 / Zhoumai 22) or (Zhoumai 22 / N9134), necrosis	7	6	22	59.0909	Heading, Field
2018-19	F2:3	(N9134 / Zhoumai 22) or (Zhoumai 22 / N9134), necrosis	9	3	22	54.5455	Heading, Field
2018-19	F2:3	(N9134 / Zhoumai 22) or (Zhoumai 22 / N9134), necrosis	9	10	22	86.3636	Heading, Field
2018-19	F2:3	(N9134 / Zhoumai 22) or (Zhoumai 22 / N9134), necrosis	10	5	22	68.1818	Heading, Field
2018-19	F2:3	(N9134 / Zhoumai 22) or (Zhoumai 22 / N9134), necrosis	7	4	22	50	Heading, Field
2018-19	F2:3	(N9134 / Zhoumai 22) or (Zhoumai 22 / N9134), necrosis	7	7	22	63.6364	Heading, Field
2018-19	F2:3	(N9134 / Zhoumai 22) or (Zhoumai 22 / N9134), necrosis	11	5	22	72.7273	Heading, Field
2018-19	F2:3	(N9134 / Zhoumai 22) or (Zhoumai 22 / N9134), necrosis	9	6	22	68.1818	Heading, Field
2018-19	F2:3	(N9134 / Zhoumai 22) or (Zhoumai 22 / N9134), necrosis	12	4	22	72.7273	Heading, Field
2018-19	F2:3	(N9134 / Zhoumai 22) or (Zhoumai 22 / N9134), necrosis	11	7	22	81.8182	Heading, Field
2018-19	F2:3	(N9134 / Zhoumai 22) or (Zhoumai 22 / N9134), necrosis	7	6	22	59.0909	Heading, Field
2018-19	F2:3	(N9134 / Zhoumai 22) or (Zhoumai 22 / N9134), necrosis	10	6	22	72.7273	Heading, Field
2018-19	F2:3	(N9134 / Zhoumai 22) or (Zhoumai 22 / N9134), necrosis	6	7	22	59.0909	Heading, Field
2018-19	F2:3	(N9134 / Zhoumai 22) or (Zhoumai 22 / N9134), necrosis	9	6	23	65.2174	Heading, Field
2018-19	F2:3	(N9134 / Zhoumai 22) or (Zhoumai 22 / N9134), necrosis	9	8	23	73.913	Heading, Field
2018-19	F2:3	(N9134 / Zhoumai 22) or (Zhoumai 22 / N9134), necrosis	12	9	23	91.3043	Heading, Field
2018-19	F2:3	(N9134 / Zhoumai 22) or (Zhoumai 22 / N9134), necrosis	8	1	23	39.1304	Heading, Field
2018-19	F2:3	(N9134 / Zhoumai 22) or (Zhoumai 22 / N9134), necrosis	10	2	23	52.1739	Heading, Field
2018-19	F2:3	(N9134 / Zhoumai 22) or (Zhoumai 22 / N9134), necrosis	7	8	23	65.2174	Heading, Field
2018-19	F2:3	(N9134 / Zhoumai 22) or (Zhoumai 22 / N9134), necrosis	9	4	23	56.5217	Heading, Field
2018-19	F2:3	(N9134 / Zhoumai 22) or (Zhoumai 22 / N9134), necrosis	5	6	24	45.8333	Heading, Field
2018-19	F2:3	(N9134 / Zhoumai 22) or (Zhoumai 22 / N9134), necrosis	7	5	24	50	Heading, Field
2018-19	F2:3	(N9134 / Zhoumai 22) or (Zhoumai 22 / N9134), necrosis	9	5	24	58.3333	Heading, Field
2018-19	F2:3	(N9134 / Zhoumai 22) or (Zhoumai 22 / N9134), necrosis	7	4	25	44	Heading, Field
2018-19	F2:3	(N9134 / Zhoumai 22) or (Zhoumai 22 / N9134), necrosis	8	7	25	60	Heading, Field
2018-19	F2:3	(N9134 / Zhoumai 22) or (Zhoumai 22 / N9134), necrosis	5	4	25	36	Heading, Field
2018-19	F2:3	(N9134 / Zhoumai 22) or (Zhoumai 22 / N9134), necrosis	9	6	25	60	Heading, Field
Total	F2:3	(N9134 / Zhoumai 22) or (Zhoumai 22 / N9134), necrosis	986	717	2637	64.581	Heading, Field
